# Supplementary material for: Down-Regulated FOXO1 in Refractory/Relapse Childhood B-Cell Acute Lymphoblastic Leukemia
Source: PubMed Central journal article supplement (PMC7686545; doi:10.3389/fonc.2020.579673), 2020-11-11
Supplement: Data_Sheet_1.pdf [file Data_Sheet_1.pdf]

# Supplementary Figure 1

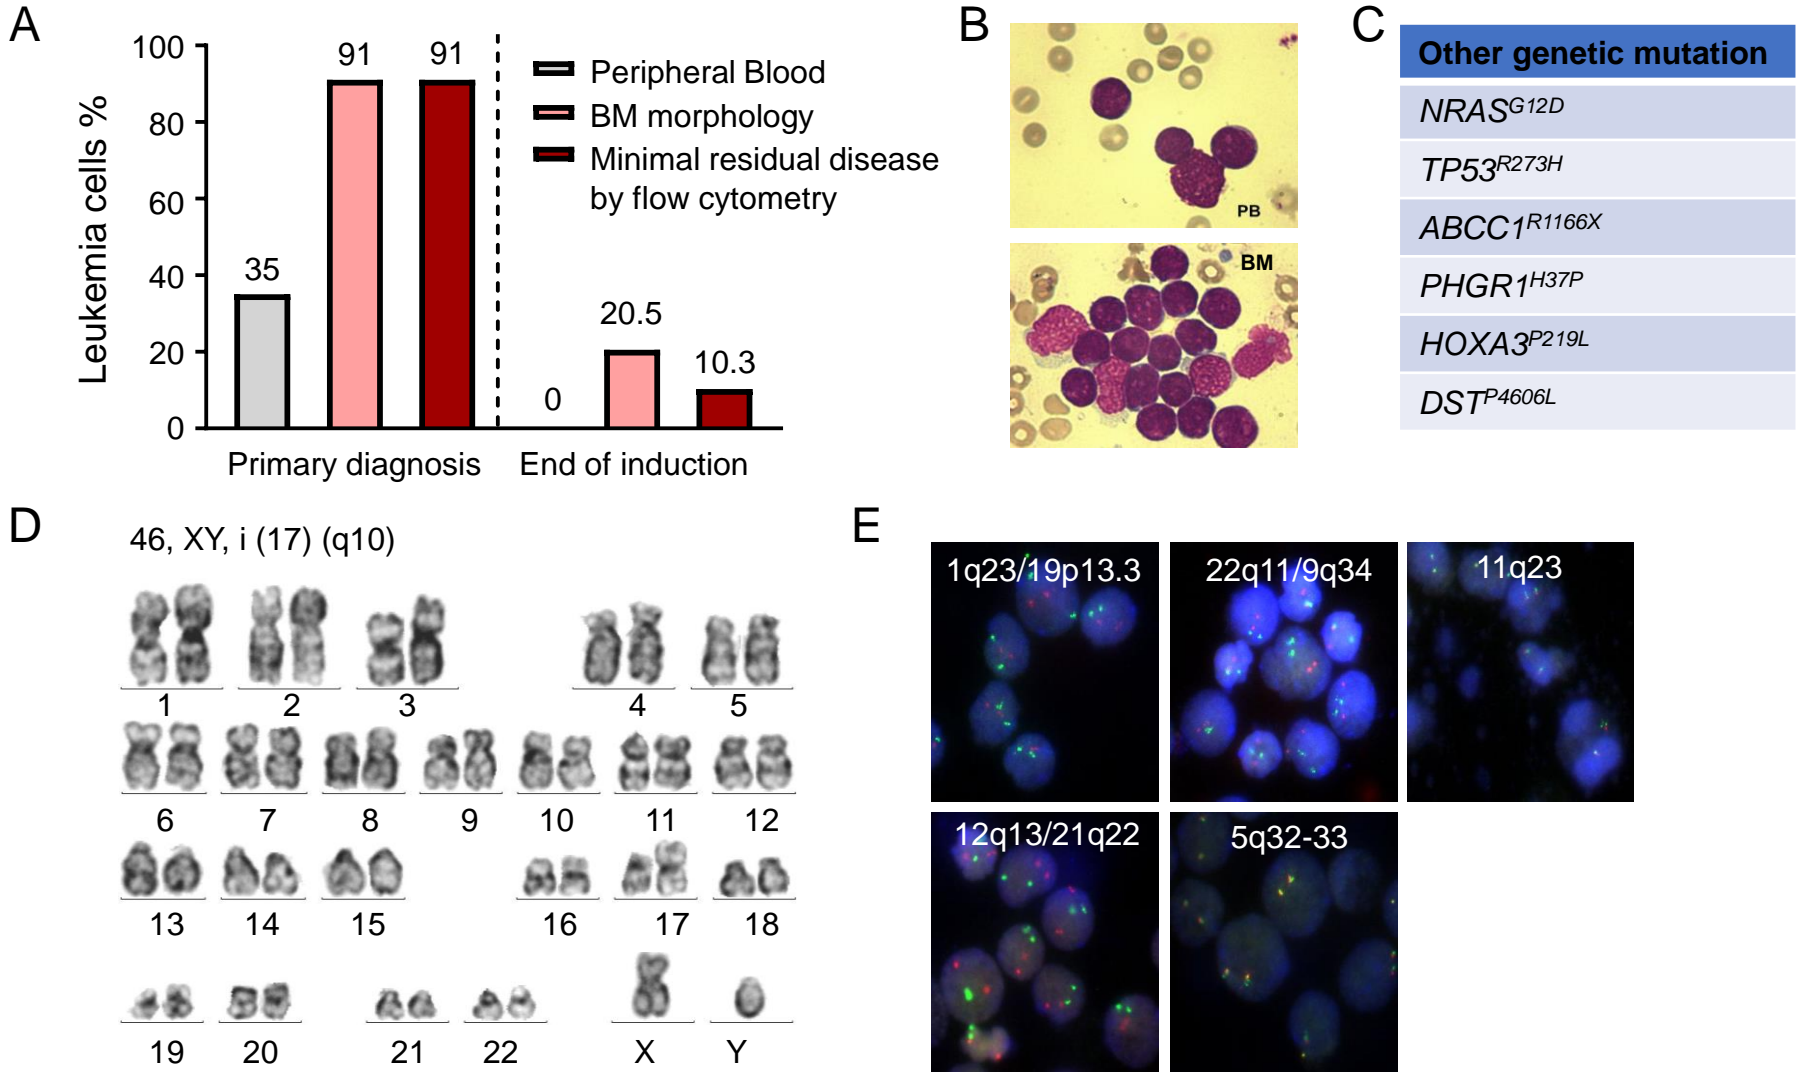

**Supplementary Figure 1. MICM feature of induction failure B-ALL case. (A) Treatment response, (B) morphology, (C-E) cytogenetics, karyotype and fluorescence in situ hybridization test in this induction failure B-ALL case.**

# Supplementary Figure 2

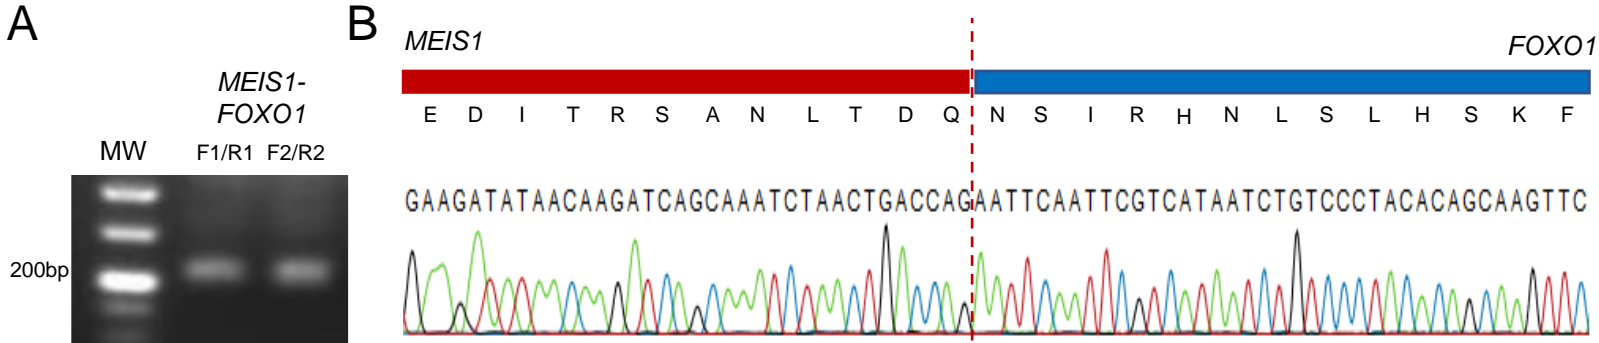

**Supplementary Figure 2. Validation of novel *MEIS1-FOXO1* fusion in this induction failure case. (A)** Reverse transcription-Polymerase Chain Reaction (RT-PCR) was performed to validate the existence of *MEIS1-FOXO1*. **(B)** Sanger sequencing of *MEIS1-FOXO1*.

Supplementary Figure 3

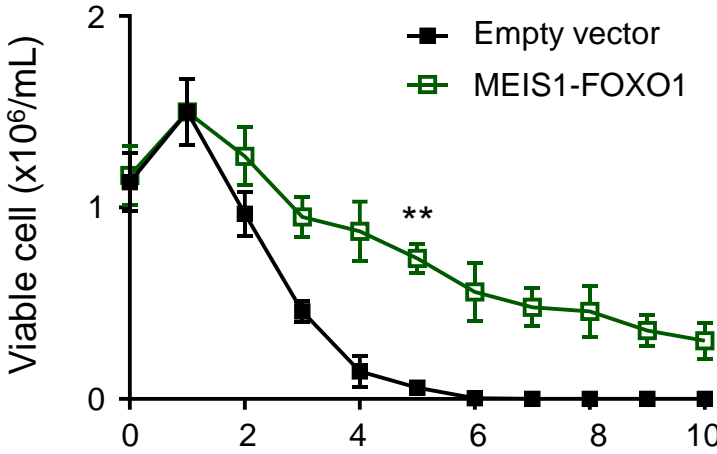

**Supplementary Figure 3. MEIS1-FOXO1 fusion potentiated Ba/F3 cells survive as compared to Ba/F3 cells transduced with mock vector.**

# Supplementary Figure 4

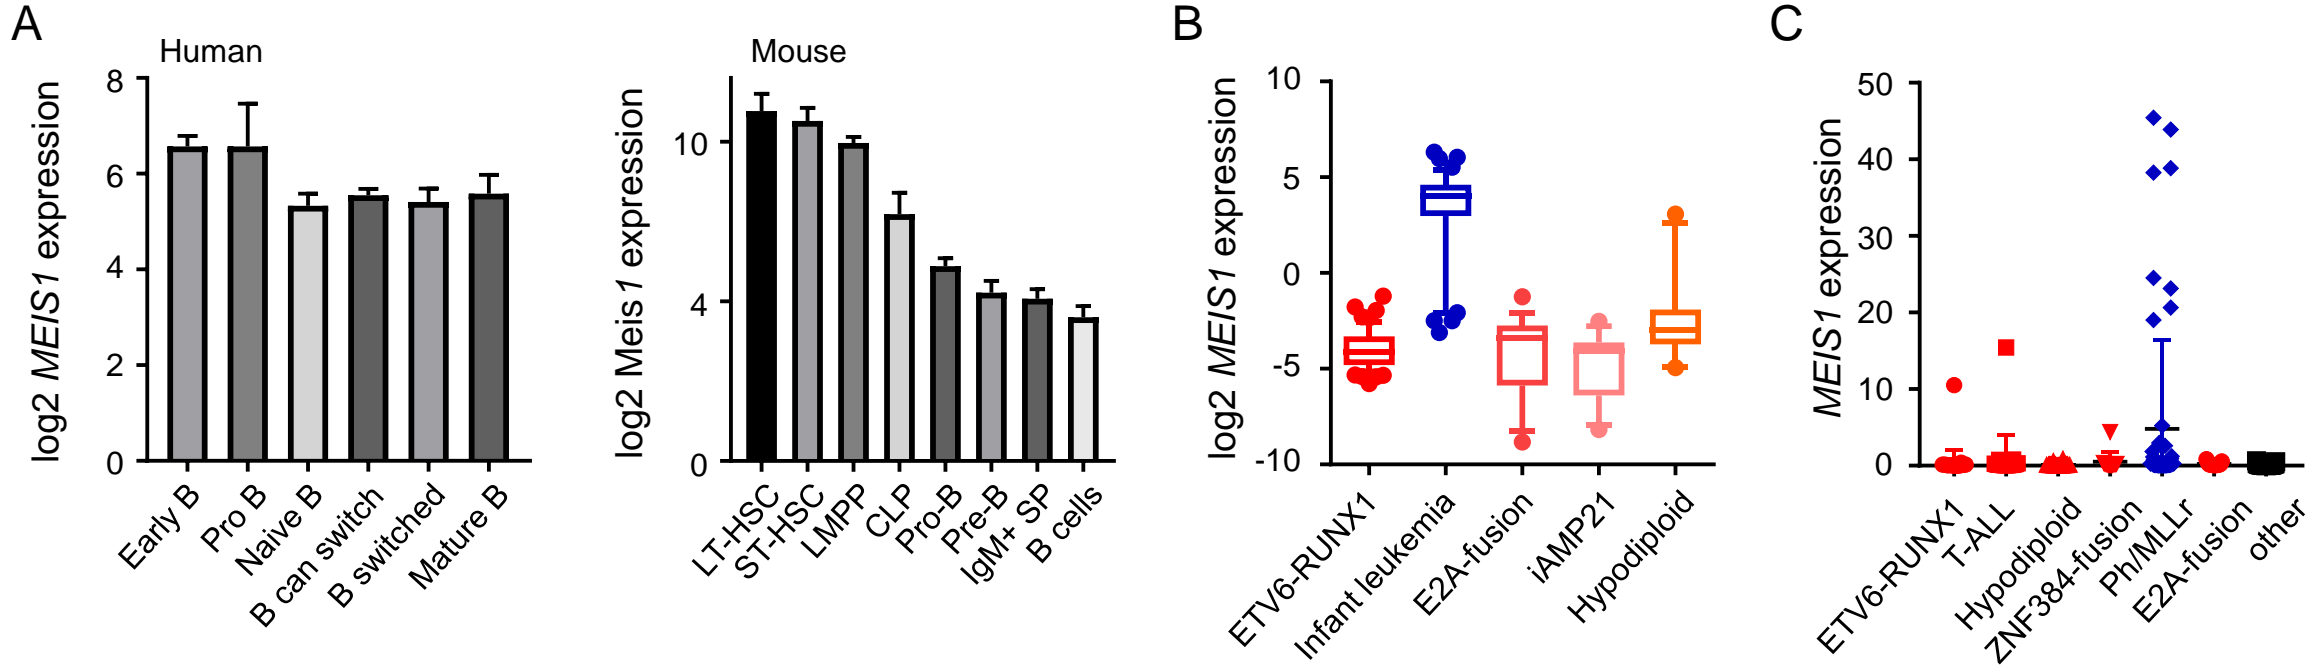

**Supplementary Figure 4. *MEIS1* in normal hematopoiesis and acute lymphoblastic leukemia.** (A) The *MEIS1* transcription during human (left panel) and mouse (right panel) mouse B cells development. (B-C) The *MEIS1* was merely expressed in childhood B-ALL.

Supplementary Figure 5

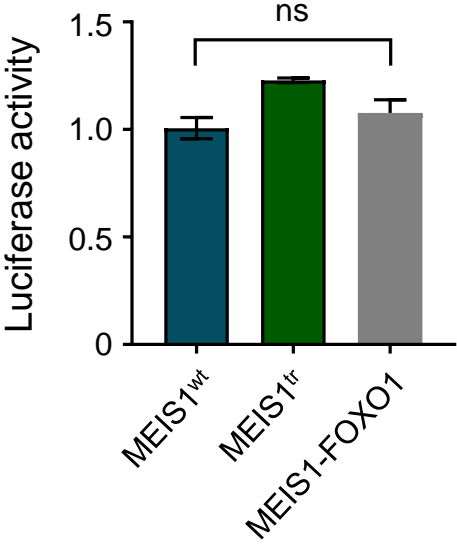

**Supplementary Figure 5. The MEIS1 transcription activity of MEIS1-FOXO1 protein was not impaired.**

# Supplementary Figure 6

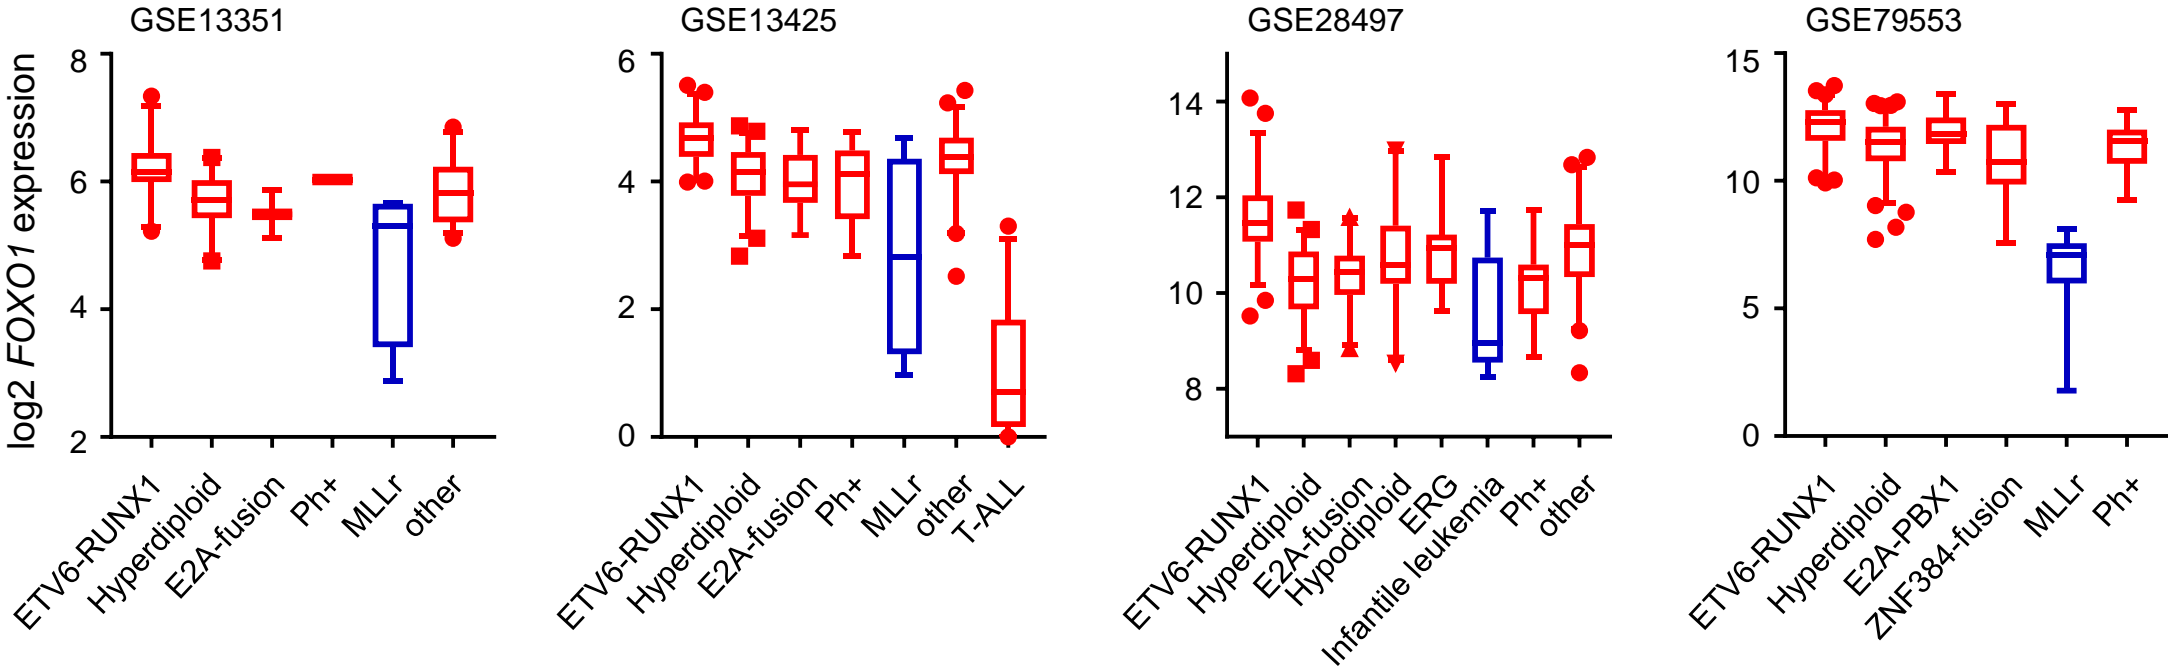

Supplementary Figure 6. FOXO1 expression within different childhood ALL subtype.

Supplementary Figure 7

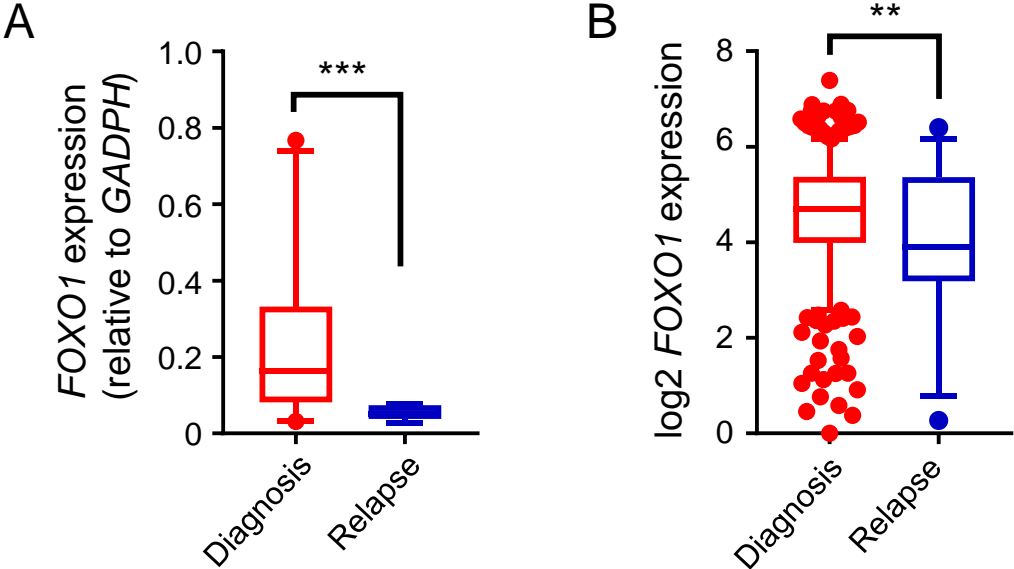

Supplementary Figure 7. FOXO1 expression was lower in relapsed B-ALL than primary B-ALL samples.

Supplementary Figure 8

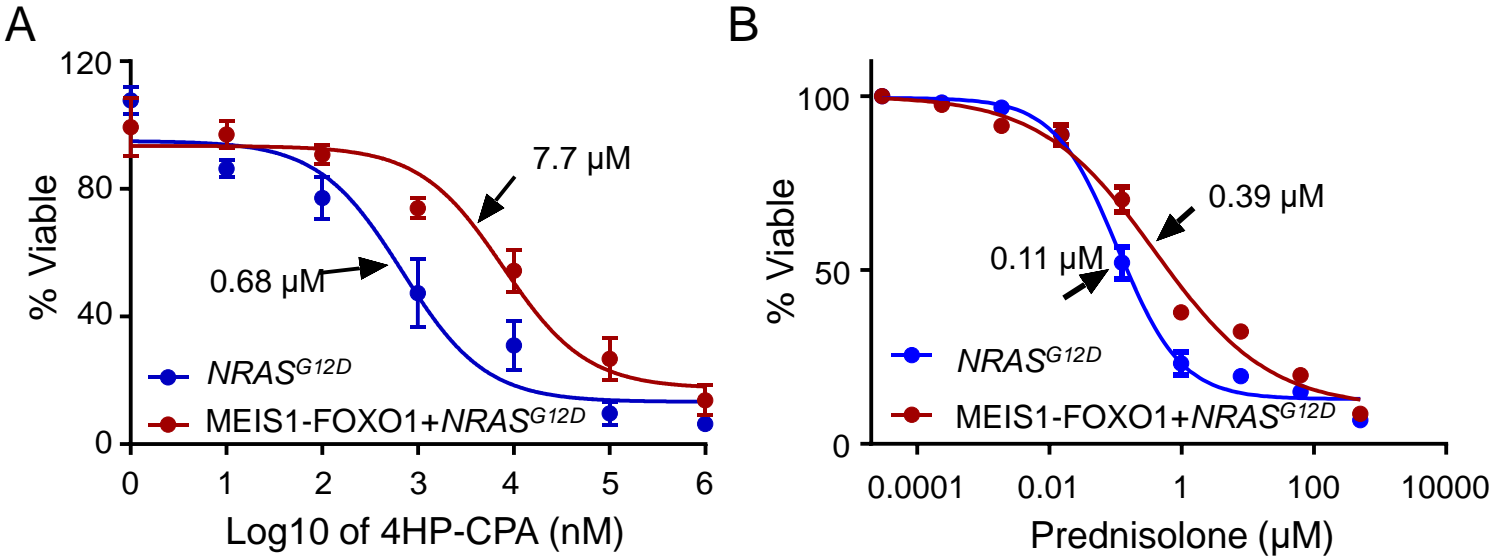

Supplementary Figure 8. Cytotoxicity of prednisolone and 4HP-CPA was examined in Ba/F3 cells with  $NRAS^{G12D}$  expression [blue line] or combination of  $MEIS1-FOXO1$  and  $NRAS^{G12D}$  [dark red line].
